# Supplementary material for: Construction of an ultrasensitive electrochemiluminescent aptasensor for ractopamine detection
Source: Royal Society of Chemistry journal article supplement (doi:10.1039/c9an00183b), 2019-01-01
Supplement: c9an00183b1.pdf [file c9an00183b1.pdf]

Supplementary Information

# Construction of Ultrasensitive Electrochemiluminescent Aptasensor for Ractopamine Detection

*Huiwen Xiong, Jingwen Gao, Ying Wang, Ziyi Chen, Miao-Miao Chen\*,  
Xiuhua Zhang\*, Shengfu Wang*

Hubei Collaborative Innovation Center for Advanced Organic Chemical Materials,  
Ministry-of-Education Key Laboratory for the Synthesis and Application of Organic  
Functional Molecules, College of Chemistry and Chemical Engineering, Hubei  
University, Wuhan 430062, China

\* E-mail: chen\_mm@whu.edu.cn and zhangxh@hubu.edu.cn

Supporting Information includes Figure S1-S3, Table S1.

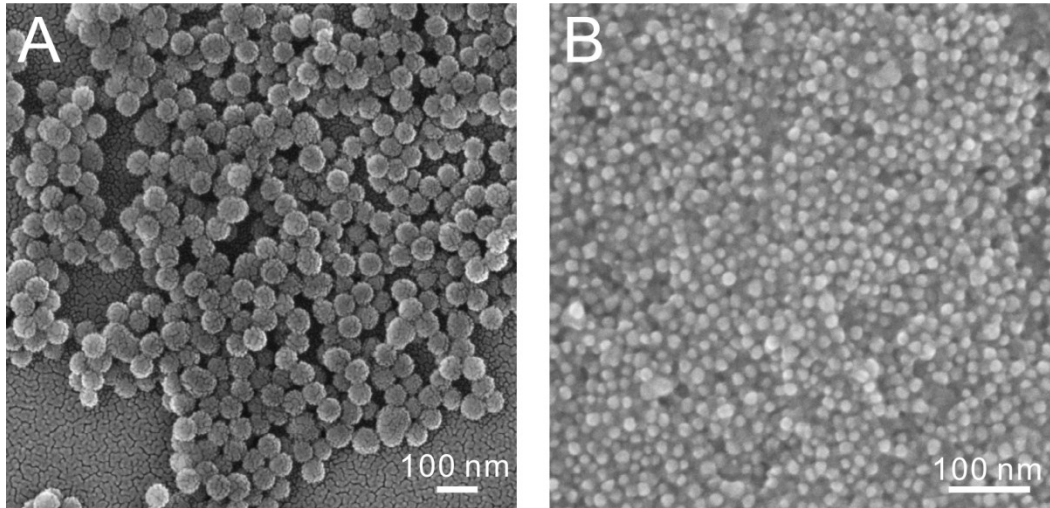

Fig. S1. SEM images of (A) Ru@SiO<sub>2</sub> NPs and (B) Au NPs.

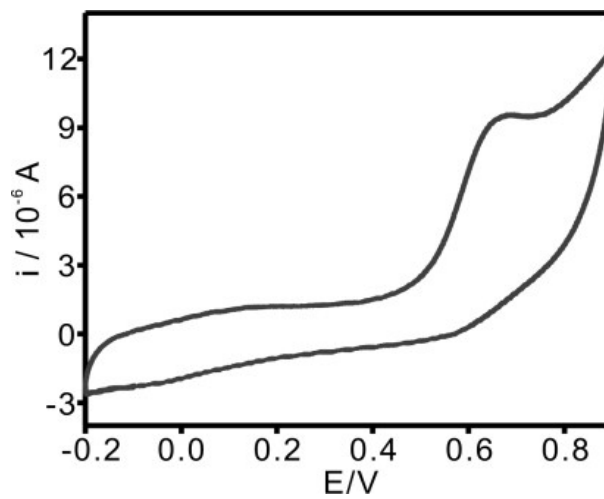

Fig. S2. Cyclic voltammograms obtained by bare GCE in 0.1 M PBS (pH 7.0) solution containing  $1.5 \times 10^{-6}$  M Rac.

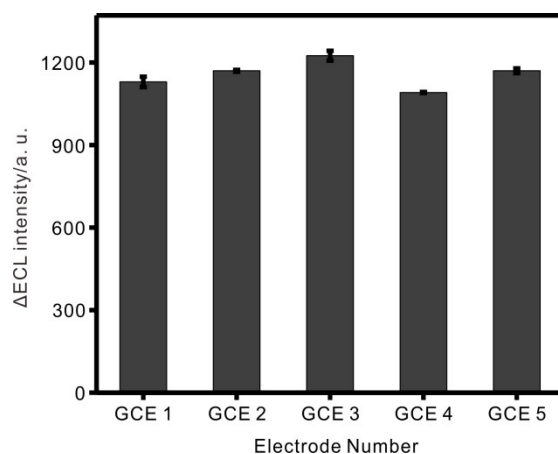

Fig. S3. Reproducibility of the ECL aptasensor with five different electrodes in 0.1 M PBS (pH 7.0) solution containing  $1.5 \times 10^{-8}$  M Rac.

**Table S1.** Comparison of the proposed sensor with other methods in Rac detection.

| Detection method | Linear range (M)                           | Detection limit (M)   | References |
|------------------|--------------------------------------------|-----------------------|------------|
| Visual detection | $3.0 \times 10^{-8} - 1.2 \times 10^{-6}$  | $3.0 \times 10^{-8}$  | [1]        |
| EC sensor        | $1.0 \times 10^{-6} - 2.8 \times 10^{-5}$  | $1.5 \times 10^{-7}$  | [2]        |
| CNPs EC sensor   | $2.0 \times 10^{-9} - 3.0 \times 10^{-8}$  | $2.0 \times 10^{-10}$ | [3]        |
| HPLC-MS/MS       | $1.5 \times 10^{-9} - 1.5 \times 10^{-7}$  | $3.0 \times 10^{-11}$ | [4]        |
| ECL aptasensor   | $1.5 \times 10^{-12} - 1.5 \times 10^{-8}$ | $4.1 \times 10^{-14}$ | This work  |

## References

- [1] P. Wang, X. Su, L. Shi and Y. Yuan, *Microchim. Acta*, 2016, 183, 2899–2905.
- [2] M. Rajkumar, Y. S. Li, S. M. Chen, *Colloid Surface B*, 2013, 110, 242–247.
- [3] S. Yao, Y. Hu, G. Li, Y. Zhang, *Electrochim. Acta*, 2012, 77, 83–88.
- [4] Y. Dong, X. Xia, X. Wang, S. Ding, X. Li, S. Zhang, et al., *Food Chem.*, 2011, 127, 327–332.
